# Supplementary material for: Perspectives on outpatient administration of CAR-T cell therapy in aggressive B-cell lymphoma and acute lymphoblastic leukemia
Source: PubMed Central journal article supplement — J Immunother Cancer. 2021 Apr 12;9(4):e002056. doi: 10.1136/jitc-2020-002056 (PMC8047987; doi:10.1136/jitc-2020-002056), 2021-04-12
Supplement: jitc-2020-002056supp001.pdf [file jitc-2020-002056supp001.pdf]

## SUPPLEMENTARY TABLES

Supplementary Table 1. CD19-directed CAR-T cell therapy product features

| Product Features       | Tisagenlecleucel (1, 2)          | Axicabtagene Ciloleucel (3)         | Lisocabtagene Maraleucel (4) |
|------------------------|----------------------------------|-------------------------------------|------------------------------|
| Costimulatory domain   | 4-1BB                            | CD28                                | 4-1BB                        |
| Vector                 | Lentivirus                       | Gamma retrovirus                    | Lentivirus                   |
| Leukapheresis material | Cryopreserved                    | Fresh                               | Fresh                        |
| Treatment setting      | Inpatient or outpatient          | Inpatient only                      | Inpatient or outpatient      |
| Approved indications   | r/r B-ALL, r/r DLBCL, HGBCL, tFL | r/r DLBCL, HGBCL, tFL,<br>r/r PMBCL | None                         |

Brexucabtagene autoleucel is an additional CD19-directed CAR-T cell therapy indicated for the treatment of adult patients with relapsed or refractory mantle cell lymphoma (5).

B-ALL, B-cell precursor acute lymphoblastic leukemia; CAR-T, chimeric antigen receptor T-cell; CD, cluster of differentiation; DLBCL, diffuse large B-cell lymphoma; HGBCL, high-grade B-cell lymphoma; PMBCL, primary mediastinal large B-cell lymphoma; r/r, relapsed or refractory; tFL, transformed follicular lymphoma.

**Supplementary Table 2. CD19-directed CAR-T cell therapy characteristics of patients, efficacy, and safety in key clinical trials**

| <b>r/r DLBCL</b>                    | <b>JULIET (6-9)<sup>a</sup><br/>N=115</b> | <b>ZUMA-1 (10)<sup>b</sup><br/>N=108<sup>c</sup></b> | <b>TRANSCEND-NHL-001<br/>(11)<sup>b</sup><br/>N=269</b> |
|-------------------------------------|-------------------------------------------|------------------------------------------------------|---------------------------------------------------------|
| Age, median (range), years          | 56 (22-76)                                | 58 (51-64)                                           | 63 (54-70)                                              |
| Age, ≥65 years, %                   | 23                                        | 24                                                   | 42                                                      |
| ECOG performance status 0-1, %      | 88                                        | 100                                                  | 99                                                      |
| No. of prior therapies, %           |                                           |                                                      |                                                         |
| 1                                   | 5                                         | 3                                                    | Median, 3<br>Range, 1-8                                 |
| 2                                   | 44                                        | 28                                                   |                                                         |
| 3                                   | 51                                        | 69 <sup>d</sup>                                      |                                                         |
| Prior autoHSCT, %                   | 49                                        | 21                                                   | 33                                                      |
| Bridging chemotherapy, %            | 90                                        | Not permitted                                        | 59                                                      |
| Best ORR, %                         | 52.2                                      | 83 <sup>e</sup>                                      | 73                                                      |
| CR, %                               | 38.3                                      | 58 <sup>f</sup>                                      | 53                                                      |
| Median DOR, months (95% CI)         | NE (10-NE)                                | 11.1 (4.2-NE) <sup>g</sup>                           | NR (8.6-NR)                                             |
| Median OS, months (95% CI)          | 11.1 (6.6-23.9)                           | NR (12.8-NE) <sup>h</sup>                            | 21.1 (13.3-NR)                                          |
| Median PFS, months (95% CI)         | 2.9 (2.2-4.2)                             | 5.9 (3.3-15.0)                                       | 6.8 (3.3-4.1)                                           |
| CRS, %                              |                                           |                                                      |                                                         |
| Grade ≥3, %                         | 57                                        | 93                                                   | 42 <sup>a</sup>                                         |
| Time to onset, median (range), days | 23                                        | 11                                                   | 2                                                       |
|                                     | 3                                         | 2 (1-12)                                             | 5 (1-14)                                                |

|                                        |             |          |           |
|----------------------------------------|-------------|----------|-----------|
| Duration, median (range), days         | 7 (2-30)    | 7 (2-58) | 5 (1-17)  |
| Neurological events, % <sup>i</sup>    | 20          | 67       | 30        |
| Grade ≥3, %                            | 11          | 32       | 10        |
| Time to onset, median (range), days    | 6 (1-17)    | 4 (1-43) | 9 (1-66)  |
| Duration, median (range), days         | 14          | 17       | 11 (1-86) |
| <b>ELIANA (12)<sup>a</sup></b>         |             |          |           |
| <b>r/r B-ALL</b>                       | <b>N=79</b> |          |           |
| Age, median (range), years             | 11 (3-24)   |          |           |
| No. of prior therapies, median (range) | 3 (1-8)     |          |           |
| Prior alloSCT, %                       | 61          |          |           |
| Overall remission rate, %              | 82          |          |           |
| MRD negative, %                        | 98          |          |           |
| Duration of remission, %               |             |          |           |
| Month 6 <sup>i</sup>                   | 81          |          |           |
| Month 12                               | 66          |          |           |
| Month 18                               | 66          |          |           |
| Month 24                               | 62          |          |           |
| OS, %                                  |             |          |           |
| Month 6 <sup>i</sup>                   | 89          |          |           |
| Month 12                               | 76          |          |           |
| Month 18                               | 70          |          |           |
| Month 24                               | 66          |          |           |

|                                     |    |
|-------------------------------------|----|
| RFS, %                              |    |
| Month 6                             | —  |
| Month 12                            | 66 |
| Month 18                            | 66 |
| Month 24                            | 62 |
| CRS, %                              | 77 |
| Grade $\geq 3$ , %                  | 49 |
| Time to onset, median, days         | 3  |
| Duration, median, days              | 8  |
| Neurological events, % <sup>j</sup> | 39 |
| Grade $\geq 3$ , %                  | 13 |
| Time to onset, median (range), days | 7  |
| Duration, median (range), days      | —  |

The purpose of this table is to summarize data. Head-to-head studies have not been performed and no comparisons can be made.

The first determination of first response was assessed at month 3 in JULIET and month 1 in ZUMA-1 and TRANSCEND-NHL-001.

The median follow-up for JULIET, ZUMA-1, and TRANSCEND-NHL-001 was 32.6, 27.1, and 18.8 months, respectively.

<sup>a</sup>CRS was graded by the Penn grading scale (JULIET, ELIANA); regrading comparisons have been published for JULIET (13).

<sup>b</sup>CRS was graded by the Lee grading scale (TRANSCEND-NHL-001, ZUMA-1).

<sup>c</sup>101/108 patients included for baseline characteristics and efficacy analyses.

<sup>d</sup> $\geq 3$  prior therapies.

<sup>e</sup>Investigator assessed, IRC assessed=74%.

<sup>f</sup>Investigator assessed, IRC assessed=54%.

<sup>g</sup>Investigator assessed, IRC assessed=NR (10.9-NE).

<sup>h</sup>Investigator and IRC assessed.

<sup>i</sup>CTCAE was not designed for grading CAR-T cell therapy-associated neurological effects. The CRES and ASTCT scales, which assess ICANS, provide more accurate assessments of neurological effects after CAR-T cell therapy (14).

<sup>j</sup>ELIANA duration of remission and OS as listed in the CIBMTR Cellular Therapy Registry (15).

alloSCT, allogeneic stem cell transplantation; ASTCT, American Society for Transplantation and Cellular Therapy; autoHSCT, autologous hematopoietic stem cell transplantation; B-ALL, B-cell precursor acute lymphoblastic leukemia; CAR-T, chimeric antigen receptor T-cell; CD, cluster of differentiation; CI, confidence interval; CIBMTR, Center for International Blood and Marrow Transplant Research; CR, complete response; CRES, CAR-T related encephalopathy syndrome; CRS, cytokine release syndrome; CTCAE, Common Terminology Criteria for Adverse Events; DLBCL, diffuse large B-cell lymphoma; DOR, duration of response; ECOG, Eastern Cooperative Oncology Group; ICANS, immune effector cell-associated neurotoxicity syndrome; IRC, independent review committee; MRD, minimal residual disease; NE, not estimable; NR, not reached; ORR, overall response rate; OS, overall survival; PFS, progression-free survival; RFS, relapse-free survival; r/r, relapsed or refractory.

**Supplementary Table 3. CD19-directed CAR-T cell therapy characteristics of patients, efficacy, and safety in the real-world treatment setting**

| r/r DLBCL                           | Tisagenlecleucel                                                         |                                          | Axicabtagene Ciloleucel                                       |                                           |
|-------------------------------------|--------------------------------------------------------------------------|------------------------------------------|---------------------------------------------------------------|-------------------------------------------|
|                                     | CIBMTR Cellular Therapy Registry (16) <sup>a</sup><br>N=155 <sup>b</sup> | Riedell, et al (17) <sup>c</sup><br>N=86 | CIBMTR Cellular Therapy Registry (18) <sup>d,e</sup><br>N=533 | Riedell, et al (17) <sup>c</sup><br>N=158 |
| Age, median (range), years          | 65 (18-89)                                                               | 67 (29-88)                               | 61 (19-86)                                                    | 59 (18-85)                                |
| Age, ≥65 years, %                   | —                                                                        | 62                                       | 70                                                            | 34                                        |
| ECOG performance status 0-1, %      | 83                                                                       | 95                                       | 80                                                            | 90                                        |
| ≥3 prior therapies, %               | 4 <sup>f</sup>                                                           | 86                                       | 66 <sup>g</sup>                                               | 73                                        |
| Prior autoHSCT, %                   | 26                                                                       | 26                                       | 32                                                            | 27                                        |
| Bridging chemotherapy, %            | —                                                                        | 75                                       | —                                                             | 61                                        |
| Best ORR, %                         | 62                                                                       | 59                                       | 74                                                            | 75 <sup>i</sup>                           |
| CR, %                               | 40                                                                       | 41                                       | —                                                             | 45 <sup>i</sup>                           |
| Median PFS, months                  | 39% at month 6<br>26% at month 12 <sup>h</sup>                           | 3.2                                      | —                                                             | 6.7                                       |
| CRS, %                              | 45                                                                       | 41                                       | 80-84                                                         | 85                                        |
| Grade ≥3, %                         | 5                                                                        | 1                                        | 8-10                                                          | 8                                         |
| Time to onset, median, days         | 4                                                                        | 3                                        | 3                                                             | 2                                         |
| Duration, median, days              | 5                                                                        | 3                                        | 7                                                             | 6                                         |
| NE, %                               | 18                                                                       | 14                                       | 55-64                                                         | 53                                        |
| Grade ≥3, %                         | 5                                                                        | 0                                        | 19-22                                                         | 33                                        |
| Time to onset, median (range), days | 8                                                                        | 4                                        | 6                                                             | 6                                         |
| Duration, median (range), days      | 7                                                                        | 4                                        | 7-10                                                          | 7                                         |

| <b>Tisagenlecleucel</b>                   |            |
|-------------------------------------------|------------|
| <b>CIBMTR Cellular Therapy</b>            |            |
| <b>Registry (16)<sup>a</sup></b>          |            |
| <b>r/r B-ALL</b>                          |            |
| <b>N=255<sup>i</sup></b>                  |            |
| Age, median (range), years                | 13 (<1-26) |
| Number of prior therapies, median (range) | 3 (0-15)   |
| Prior alloSCT, %                          | 28         |
| CR, %                                     | 86         |
| MRD negative, %                           | 99         |
| Duration of remission, % at month 6       | 78         |
| OS, % at month 6                          | 89         |
| OS, % at month 12                         | 77         |
| EFS, % at month 6                         | 69         |
| EFS, % at month 12                        | 52         |
| CRS, %                                    | 55         |
| Grade ≥3, %                               | 16         |
| Time to onset, median, days               | 6          |
| Duration, median, days                    | 7          |
| NE, %                                     | 27         |
| Grade ≥3, %                               | 9          |
| Time to onset, median, days               | 7          |
| Duration, median, days                    | 7          |

The purpose of this table is to summarize data. Head-to-head studies have not been performed and no comparisons can be made.

<sup>a</sup>CRS was graded by the ASTCT grading scale.

<sup>b</sup>152/155 patients included for efficacy.

<sup>c</sup>Institutional scale grading/ASTCT scale grading.

<sup>d</sup>Patients <65 – patients >65 years of age.

<sup>e</sup>CRS was graded by the Lee grading scale.

---

<sup>†</sup>Median number of prior therapies.

<sup>g</sup>>3 prior therapies.

<sup>h</sup><10 patients at risk at this time point.

<sup>i</sup>30 days post infusion.

<sup>j</sup>249/255 patients included for efficacy.

alloSCT, allogeneic stem cell transplantation; ASTCT, American Society for Transplantation and Cellular Therapy; autoHSCT, autologous hematopoietic stem cell transplantation; B-ALL, B-cell precursor acute lymphoblastic leukemia; CAR-T, chimeric antigen receptor T-cell; CD, cluster of differentiation; CIBMTR, Center for International Blood and Marrow Transplant Research; CR, complete response; CRS, cytokine release syndrome; DLBCL, diffuse large B-cell lymphoma; DOR, duration of remission; ECOG, Eastern Cooperative Oncology Group; EFS, event-free survival; MRD, minimal residual disease; NE, neurological events; PFS, progression-free survival; ORR, overall response rate; OS, overall survival; r/r, relapsed or refractory.

**REFERENCES**

1. Tyagarajan S, Schmitt D, Acker C, Rutjens E. Autologous cryopreserved leukapheresis cellular material for chimeric antigen receptor-T cell manufacture. *Cytotherapy*. 2019;21(12):1198-205.
2. Tyagarajan S, Spencer T, Smith J. Optimizing CAR-T cell manufacturing processes during pivotal clinical trials. *Mol Ther Methods Clin Dev*. 2019;16:136-44.
3. Viardot A, Wais V, Sala E, Koerper S. Chimeric antigen receptor (CAR) T-cell therapy as a treatment option for patients with B-cell lymphomas: perspectives on the therapeutic potential of Axicabtagene ciloleucel. *Cancer Manag Res*. 2019;11:2393-404.
4. Abramson JS. Anti-CD19 CAR T-cell therapy for B-cell non-Hodgkin lymphoma. *Transfus Med Rev*. 2020;34(1):29-33.
5. TECARTUS (brexucabtagene autoleucel) [US prescribing information]. Santa Monica, California: Kite Pharma, Inc; 2020.
6. Schuster SJ, Bishop MR, Tam C, Borchmann P, Jaeger U, Waller EK, et al. Sustained disease control for adult patients with relapsed or refractory diffuse large B-cell lymphoma: an updated analysis of Juliet, a global pivotal phase 2 trial of tisagenlecleucel. *Blood*. 2018;132(suppl\_1): Abstract 1684.
7. Schuster SJ, Bishop MR, Tam CS, Waller EK, Borchmann P, McGuirk JP, et al. Tisagenlecleucel in adult relapsed or refractory diffuse large B-cell lymphoma. *The New England journal of medicine*. 2019;380(1):45-56.
8. Westin JR, Tam CS, Borchmann P, Jaeger U, McGuirk JP, Holte H, et al. Correlative analyses of patient and clinical characteristics associated with efficacy in tisagenlecleucel-treated relapsed/refractory diffuse large B-cell lymphoma patients in the Juliet trial. *Blood*. 2019;134(suppl 1):Abstract 4103.
9. Borchmann P, Tam CS, Jäger U, McGuirk JP, Holte H, Waller EK, et al. An updated analysis of JULIET, a global pivotal phase 2 trial of tisagenlecleucel in adult patients with relapsed or refractory (R/R) diffuse large B-cell lymphoma (DLBCL). *European Hematology Association*, June 16, 2018; Stockholm, Sweden. Abstract #S799.
10. Locke FL, Ghobadi A, Jacobson CA, Miklos DB, Lekakis LJ, Oluwole OO, et al. Long-term safety and activity of axicabtagene ciloleucel in refractory large B-cell lymphoma (ZUMA-1): a single-arm, multicentre, phase 1-2 trial. *Lancet Oncol*. 2019;20(1):31-42.
11. Abramson JS, Palomba ML, Gordon LI, Lunning MA, Wang M, Arnason J, et al. Lisocabtagene maraleucel for patients with relapsed or refractory large B-cell lymphomas (TRANSCEND NHL 001): a multicentre seamless design study. *Lancet*. 2020;396(10254):839-52.
12. Grupp SA, Maude SL, Rives S, Baruchel A, Boyer MW, Bittencourt H, et al. Updated analysis of the efficacy and safety of tisagenlecleucel in pediatric and young adult



- patients with relapsed/refractory (r/r) acute lymphoblastic leukemia. *Blood*. 2018;132(suppl 1):Abstract 895.
13. Schuster SJ, Maziarz RT, Rusch ES, Li J, Signorovitch JE, Romanov VV, et al. Grading and management of cytokine release syndrome in patients treated with tisagenlecleucel in the JULIET trial. *Blood Adv*. 2020;4(7):1432-9.
  14. Maziarz RT, Schuster SJ, Romanov VV, Rusch ES, Li J, Signorovitch JE, et al. Grading of neurological toxicity in patients treated with tisagenlecleucel in the JULIET trial. *Blood Adv*. 2020;4(7):1440-7.
  15. Grupp S, Hu Z-H, Zhang Y, Keating A, Pulsipher MA, Philips C, et al. Tisagenlecleucel chimeric antigen receptor (CAR) T-cell therapy for relapsed/refractory children and young adults with acute lymphoblastic leukemia (ALL): real world experience from the Center for International Blood and Marrow Transplant Research (CIBMTR) and Cellular Therapy (CT) Registry. *Blood*. 2019;134(Suppl 1):Abstract 2619.
  16. Pasquini MC, Hu ZH, Curran K, Laetsch T, Locke F, Rouce R, et al. Real-world evidence of tisagenlecleucel for pediatric acute lymphoblastic leukemia and non-Hodgkin lymphoma. *Blood Adv*. 2020;4(21):5414-24.
  17. Riedell PA WC, Nastoupil LJ, Pennisi M, Maziarz RT, McGuirk JP, Oluwole OO, Bachanova V, Hwang W-T, Schuster SJ, Perales M, Bishop MR, and Porter DL. A multicenter retrospective analysis of outcomes and toxicities with commercial axicabtagene ciloleucel and tisagenlecleucel for relapsed/refractory aggressive B-cell lymphomas. *Transplantation and Cellular Therapy Meetings of ASTCT and CIBMTR*. 2020;Oral 52.
  18. Pasquini MC, Locke FL, Herrera AF, Siddiqi T, Ghobadi A, Komanduri KV, et al. Post-marketing use outcomes of an anti-CD19 chimeric antigen receptor (CAR) T cell therapy, axicabtagene ciloleucel (axi-cel), for the treatment of large B cell lymphoma (LBCL) in the United States (US). *Blood*. 2019;134(suppl\_1):Abstract 764.
